# Supplementary material for: A series of planar tetranuclear lanthanide complexes: axial ligand modulated magnetic dynamics in Dy4 species
Source: Royal Society of Chemistry journal article supplement (doi:10.1039/c7ra11750g), 2017-01-01
Supplement: c7ra11750g1.pdf [file c7ra11750g1.pdf]

## A series of planar tetranuclear lanthanide complexes: axial ligand modulated magnetic dynamics in Dy<sub>4</sub> species

Ya-Xin Zhang,<sup>a</sup> Meng Li,<sup>a</sup> Bi-Ying Liu,<sup>a</sup> Zhi-Lei Wu,<sup>\*a</sup> Hai-Ying Wei,<sup>\*a</sup> Wen-Min Wang<sup>\*b</sup>

<sup>a</sup> College of Chemistry and Environmental Science, Hebei University, Baoding, 071002, P. R. China.

<sup>b</sup> Department of Chemistry, Tianjin University, Tianjin, 300072, China.

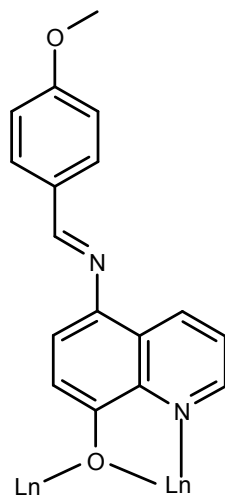

Scheme S1. The  $\mu_2\text{-}\eta^2\eta^1$  bonding mode of L<sup>-</sup>.

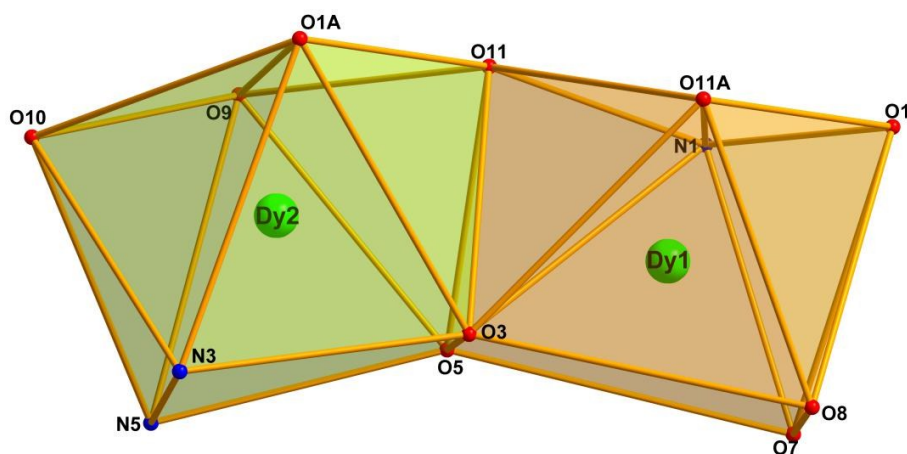

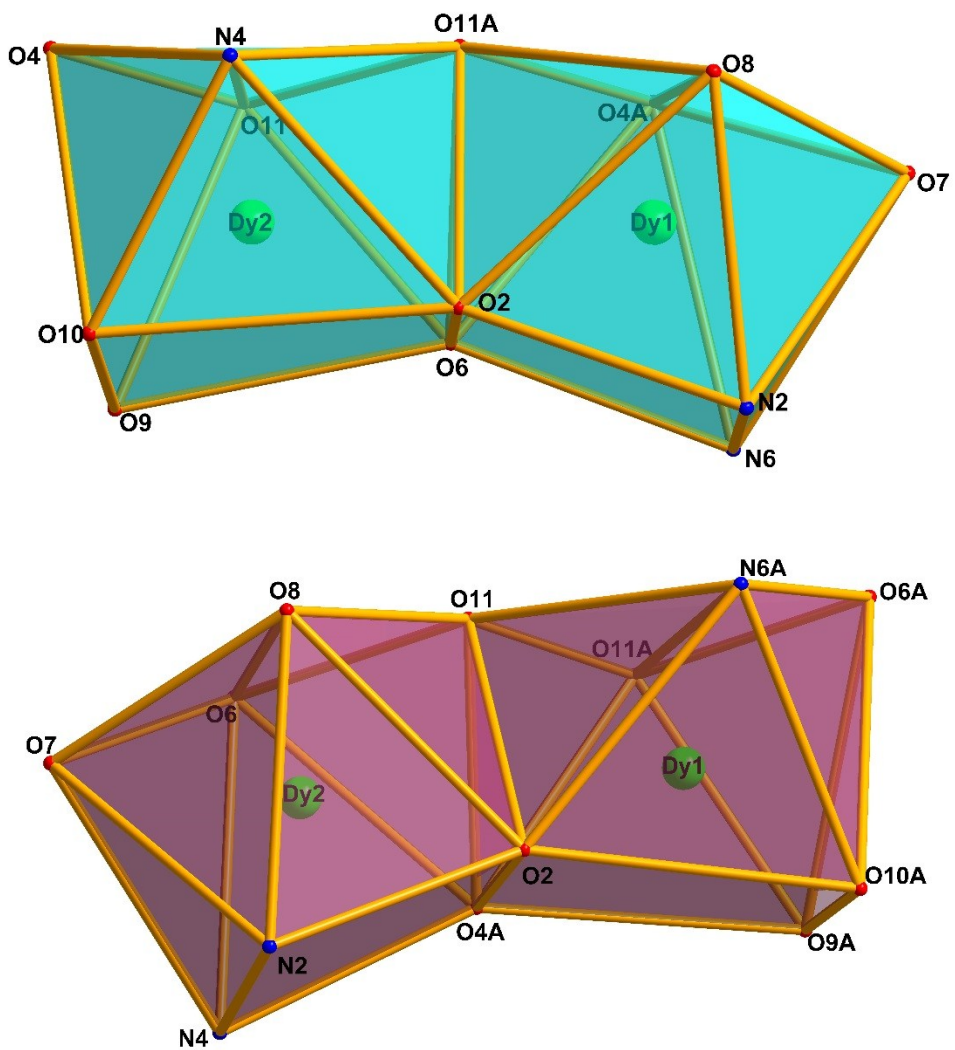

**Fig. S1.** The eight coordinated environment of Dy<sup>3+</sup> in compounds **3** (top), **9** (middle) and **10** (bottom), respectively.

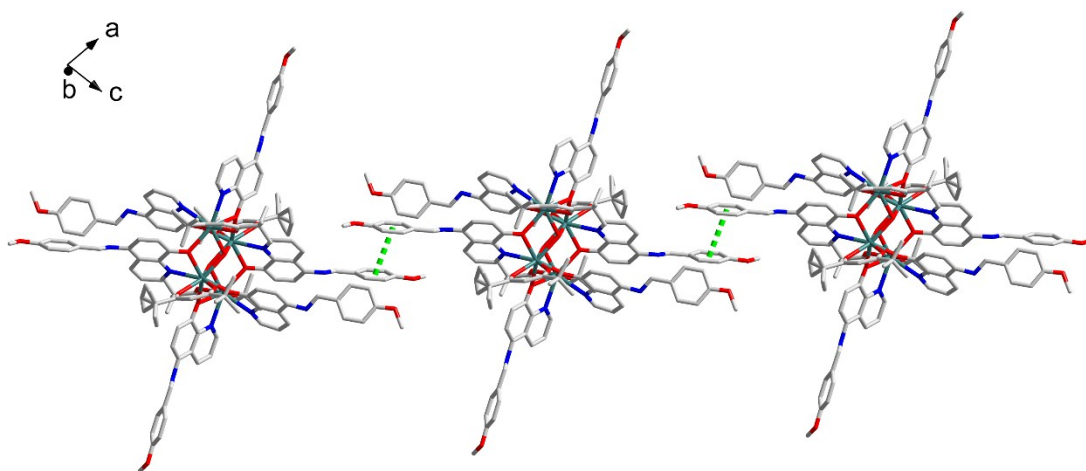

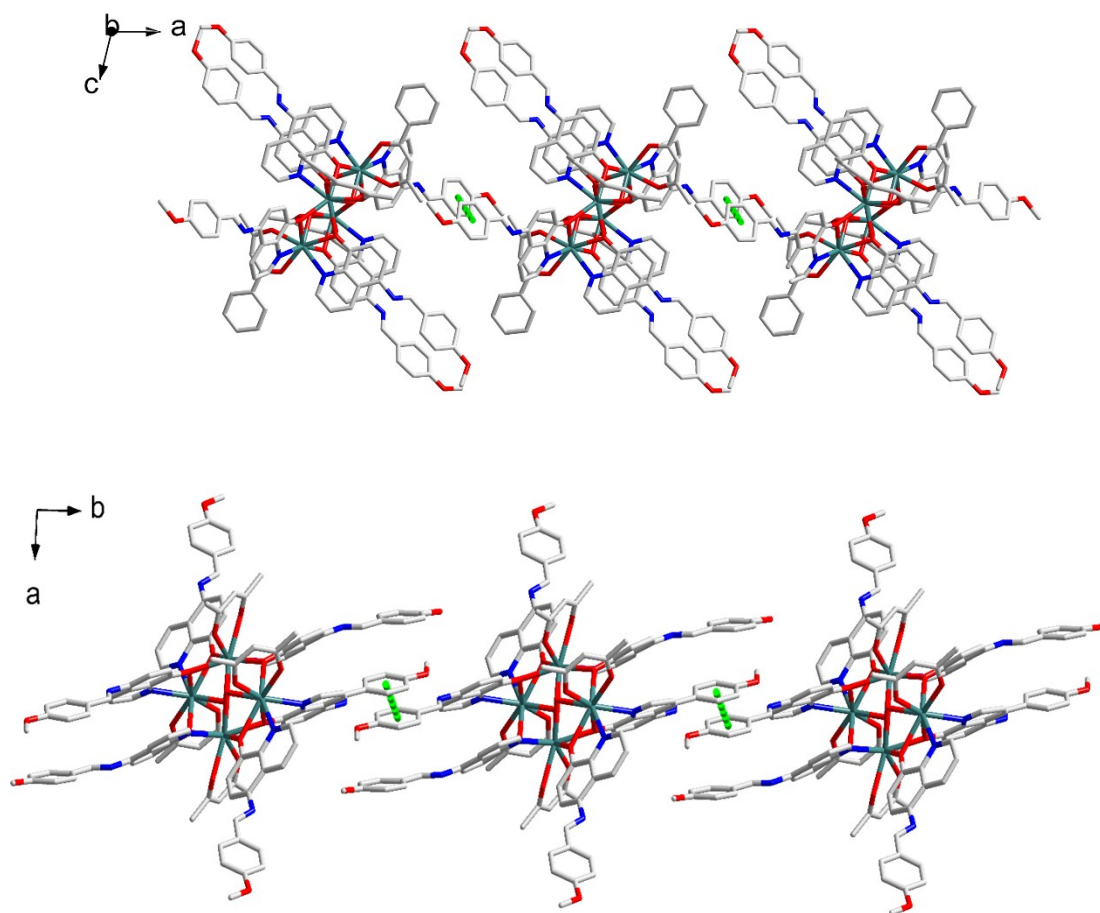

**Fig. S2.** The crystal packing of compounds **3** (top), **9** (middle) and **10** (bottom) showing the interactions between the molecules in them.

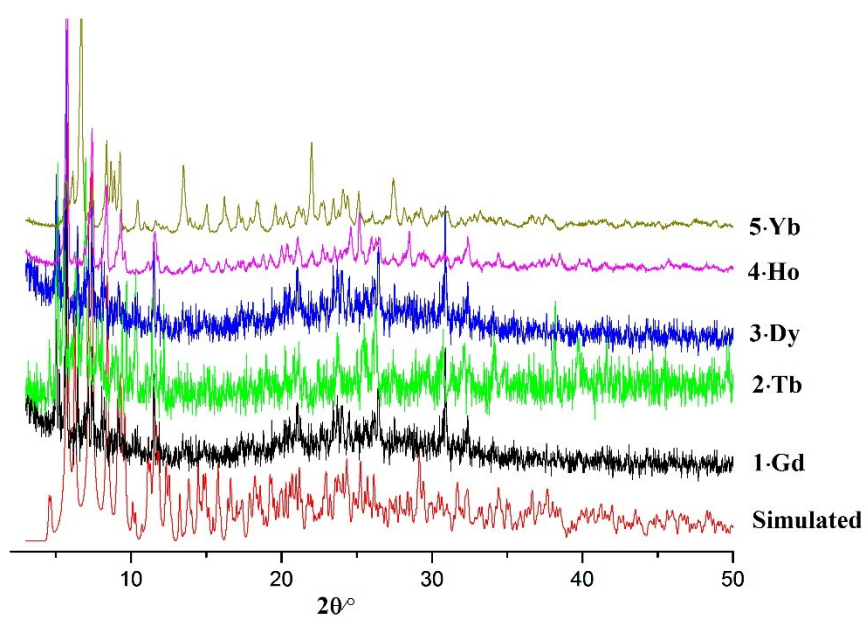

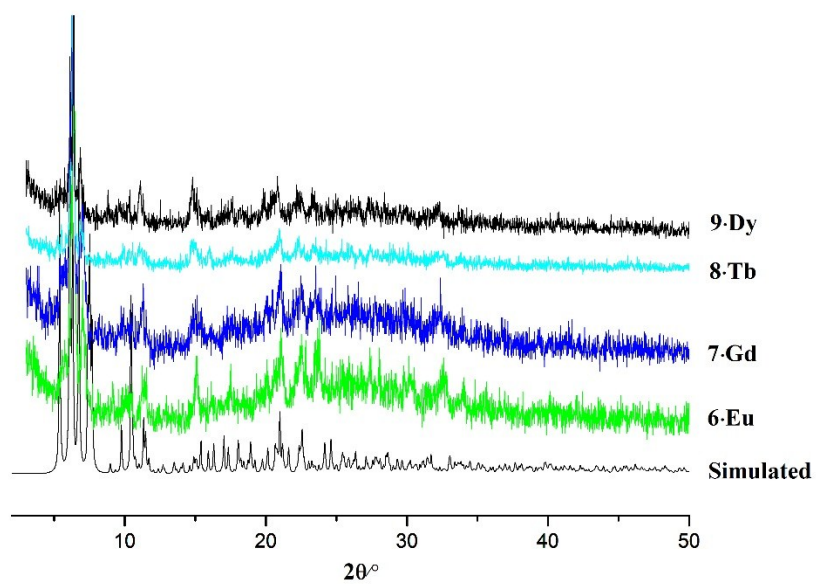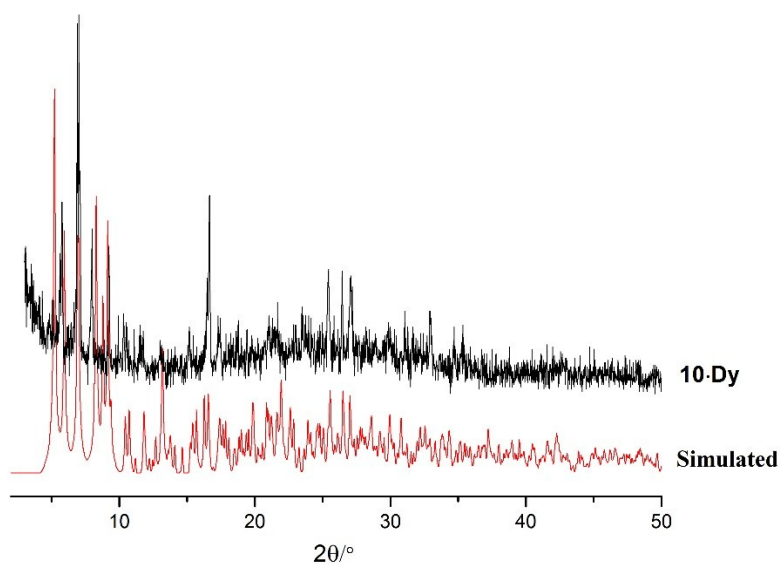

**Fig. S3.** Simulated and experimental PXR patterns of compounds 1-5 (top), 6-9 (middle) and 10 (bottom).

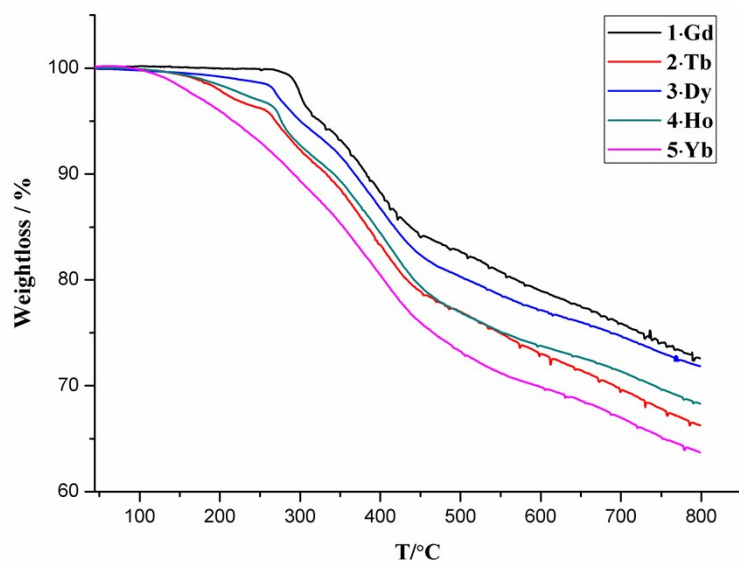

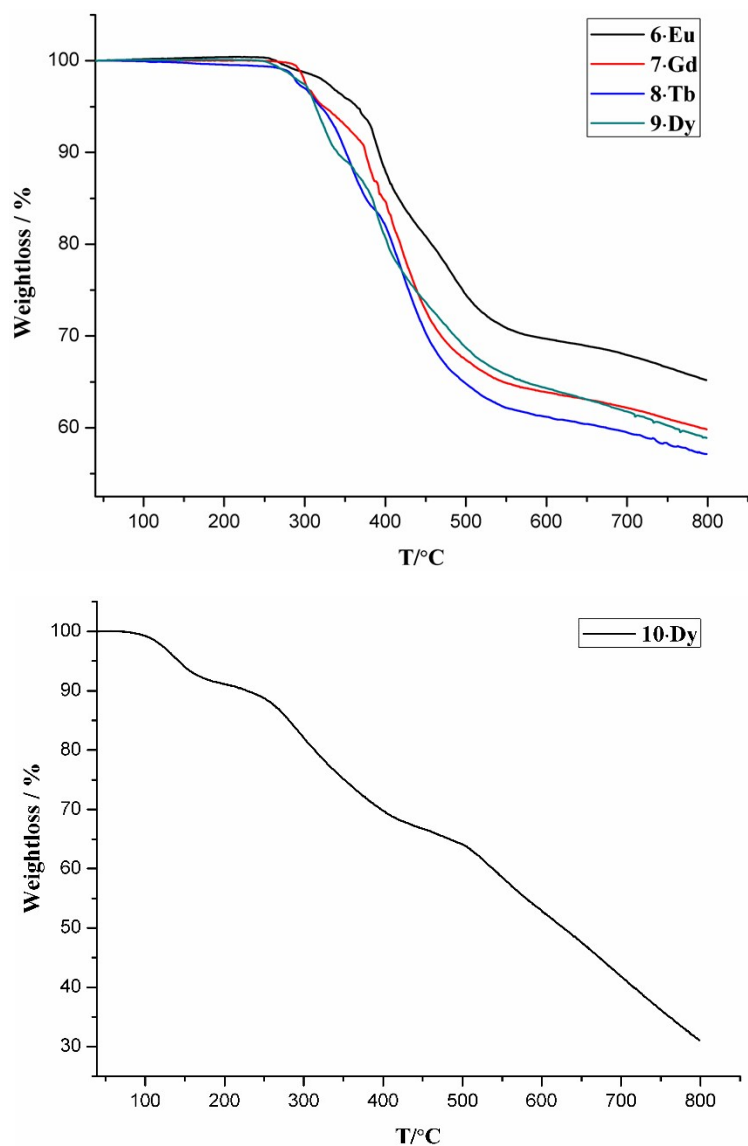

Fig. S4. TGA curves of compounds 1-5, 6-9 and 10, respectively.

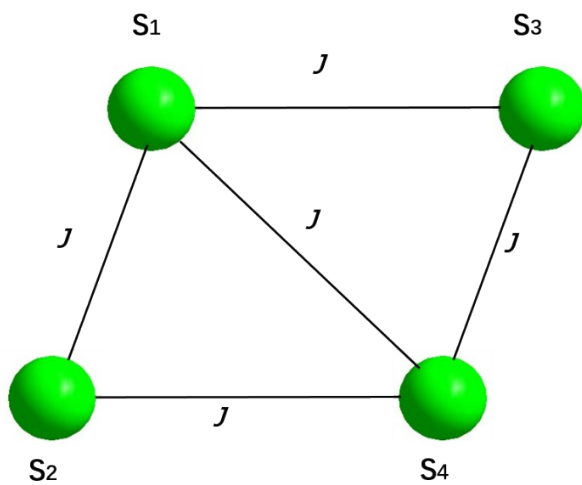

Fig. S5. The model used to fit the  $\chi_M T \sim T$  plots for 1-Gd and 7-Gd.

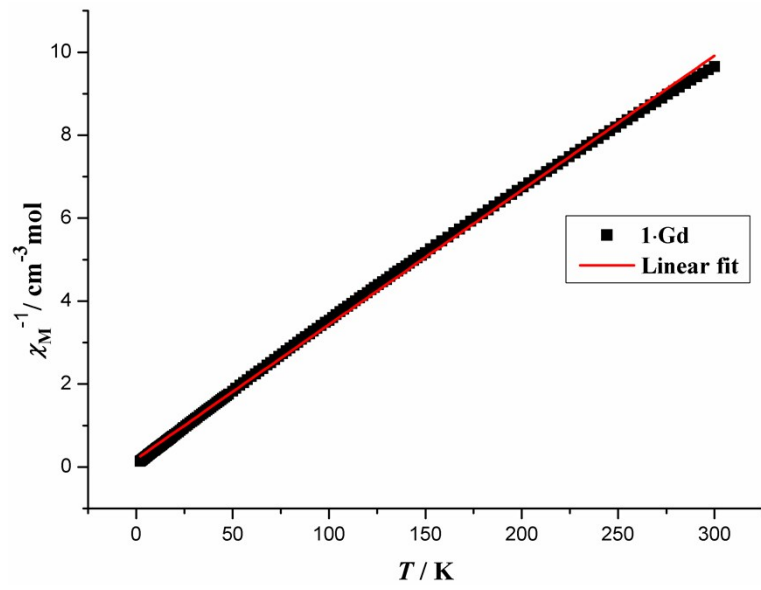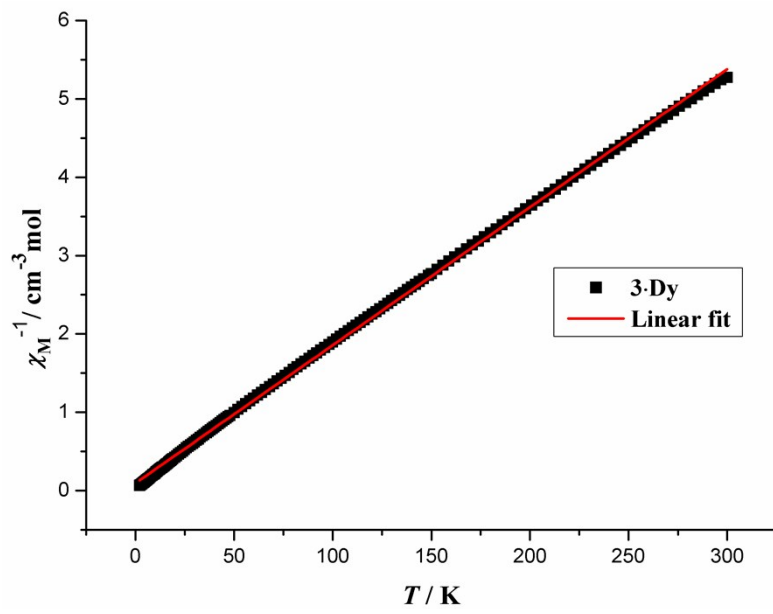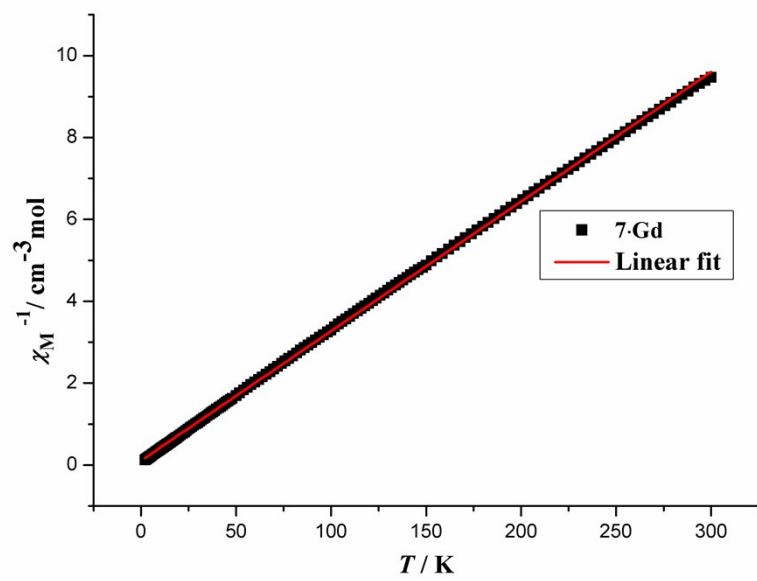

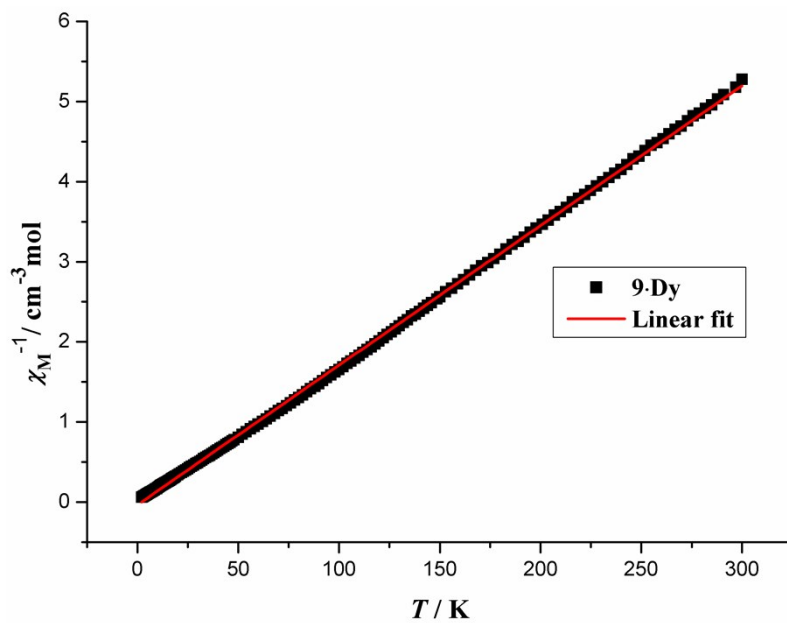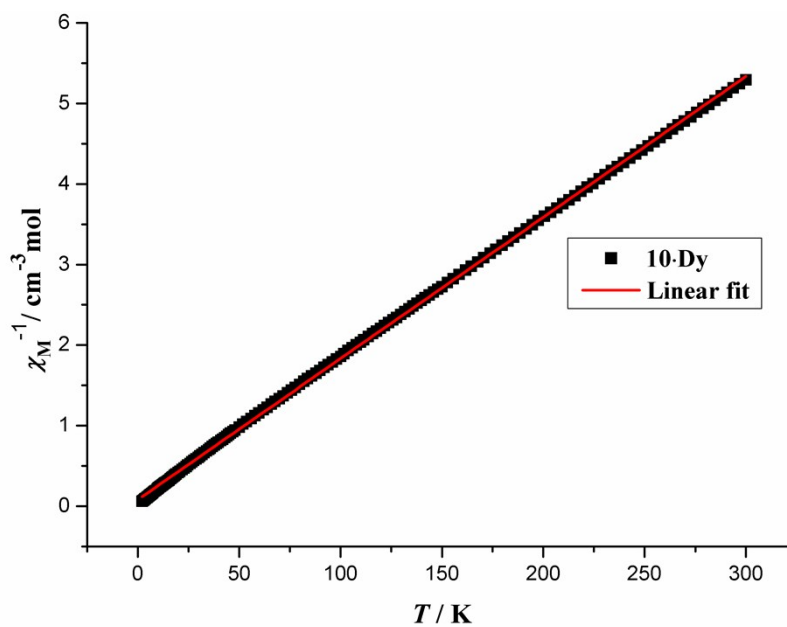

**Fig. S6.** The  $\chi_M^{-1}$  versus  $T$  and the Curie-Weiss fit for 1·Gd, 3·Dy, 7·Gd, 9·Dy and 10·Dy.

**Table S1.** Crystal data and structure refinements for compounds 1-5.

|                                                                                | 1·Gd                                                                                  | 2·Tb                                                                                | 3·Dy                                                                                  | 4·Ho                                                                                  | 5·Yb                                                                                  |
|--------------------------------------------------------------------------------|---------------------------------------------------------------------------------------|-------------------------------------------------------------------------------------|---------------------------------------------------------------------------------------|---------------------------------------------------------------------------------------|---------------------------------------------------------------------------------------|
| formula                                                                        | C <sub>127</sub> H <sub>115.5</sub> Gd <sub>4</sub> N <sub>14.5</sub> O <sub>22</sub> | C <sub>127</sub> H <sub>115.5</sub> Tb <sub>4</sub> N <sub>14</sub> O <sub>22</sub> | C <sub>127</sub> H <sub>115.5</sub> Dy <sub>4</sub> N <sub>14.5</sub> O <sub>22</sub> | C <sub>127</sub> H <sub>115.5</sub> Ho <sub>4</sub> N <sub>14.5</sub> O <sub>22</sub> | C <sub>127</sub> H <sub>115.5</sub> Yb <sub>4</sub> N <sub>14.5</sub> O <sub>22</sub> |
| fw                                                                             | 2825.85                                                                               | 2832.55                                                                             | 2846.85                                                                               | 2856.57                                                                               | 2888.99                                                                               |
| <i>T</i> /K                                                                    | 293(2)h                                                                               | 293(2)                                                                              | 113(2)                                                                                | 293(2)                                                                                | 293(2)                                                                                |
| Cryst syst                                                                     | Triclinic                                                                             | Triclinic                                                                           | Triclinic                                                                             | Triclinic                                                                             | Triclinic                                                                             |
| Space group                                                                    | <i>P</i> -1                                                                           | <i>P</i> -1                                                                         | <i>P</i> -1                                                                           | <i>P</i> -1                                                                           | <i>P</i> -1                                                                           |
| <i>a</i> /Å                                                                    | 16.0344(2)                                                                            | 16.0380(6)                                                                          | 15.8898(9)                                                                            | 16.0223(6)                                                                            | 15.9945(6)                                                                            |
| <i>b</i> /Å                                                                    | 19.862(2)                                                                             | 19.7829(8)                                                                          | 19.6837(1)                                                                            | 19.7955(7)                                                                            | 19.7881(6)                                                                            |
| <i>c</i> /Å <sup>3</sup>                                                       | 20.309(2)                                                                             | 20.3633(8)                                                                          | 20.3485(9)                                                                            | 20.3368(7)                                                                            | 20.2867(7)                                                                            |
| <i>α</i> /°                                                                    | 76.952(4)                                                                             | 76.7080(1)                                                                          | 76.789(3)                                                                             | 76.8060(1)                                                                            | 76.9190(1)                                                                            |
| <i>β</i> /°                                                                    | 72.697(4)                                                                             | 73.0480(1)                                                                          | 73.047(3)                                                                             | 72.9870(1)                                                                            | 72.8040(1)                                                                            |
| <i>γ</i> /°                                                                    | 86.957(4)                                                                             | 87.7160(1)                                                                          | 87.924(4)                                                                             | 87.5900(1)                                                                            | 87.3730(1)                                                                            |
| Volume/Å <sup>3</sup>                                                          | 6015.1(1)                                                                             | 6012.0(4)                                                                           | 5923.6(6)                                                                             | 6003.0(4)                                                                             | 5973.0(4)                                                                             |
| <i>Z</i>                                                                       | 2                                                                                     | 2                                                                                   | 2                                                                                     | 2                                                                                     | 2                                                                                     |
| ρ <sub>calc</sub> /mg/mm <sup>3</sup>                                          | 1.504                                                                                 | 1.531                                                                               | 1.596                                                                                 | 1.580                                                                                 | 1.606                                                                                 |
| μ/mm <sup>-1</sup>                                                             | 2.248                                                                                 | 2.397                                                                               | 2.570                                                                                 | 2.683                                                                                 | 3.179                                                                                 |
| <i>F</i> (000)                                                                 | 2712                                                                                  | 2764                                                                                | 2838                                                                                  | 2846                                                                                  | 2870                                                                                  |
| 2θ range for data collection                                                   | 2.843 to 25.010                                                                       | 2.891 to 25.009                                                                     | 3.056 to 25.009                                                                       | 2.935 to 28.347                                                                       | 2.897 to 25.010                                                                       |
| Reflections collected                                                          | 114775                                                                                | 255204                                                                              | 65209                                                                                 | 91179                                                                                 | 76384                                                                                 |
| Unique reflns                                                                  | 21112                                                                                 | 21167                                                                               | 20695                                                                                 | 29490                                                                                 | 20970                                                                                 |
| Goodness-of-fit on <i>F</i> <sup>2</sup>                                       | 1.022                                                                                 | 1.034                                                                               | 1.021                                                                                 | 1.032                                                                                 | 1.028                                                                                 |
| <i>R</i> <sub>1</sub> , <i>wR</i> <sub>2</sub><br>( <i>I</i> > 2σ( <i>I</i> )) | 0.0647, 0.1339                                                                        | 0.0369, 0.0768                                                                      | 0.0270, 0.0731                                                                        | 0.0516, 0.0904                                                                        | 0.0473,<br>0.0990                                                                     |
| <i>R</i> <sub>1</sub> , <i>wR</i> <sub>2</sub> (all data)                      | 0.1229, 0.1562                                                                        | 0.0466, 0.0811                                                                      | 0.0332, 0.0755                                                                        | 0.0956, 0.1102                                                                        | 0.0921,<br>0.1228                                                                     |
| Largest diff. Peak/hole/ e Å <sup>-3</sup>                                     | 1.785/-1.373                                                                          | 1.138/-0.730                                                                        | 1.174/-0.799                                                                          | 2.512/-1.196                                                                          | 1.698/-1.332                                                                          |



**Table S2.** Crystal data and structure refinements for compounds **6-10**.

|                                                                                         | <b>6-Eu</b>                                                                       | <b>7-Gd</b>                                                                       | <b>8-Tb</b>                                                                       | <b>9-Dy</b>                                                                       | <b>10-Dy</b>                                                                      |
|-----------------------------------------------------------------------------------------|-----------------------------------------------------------------------------------|-----------------------------------------------------------------------------------|-----------------------------------------------------------------------------------|-----------------------------------------------------------------------------------|-----------------------------------------------------------------------------------|
| formula                                                                                 | C <sub>154</sub> H <sub>174</sub> Eu <sub>4</sub> N <sub>14</sub> O <sub>24</sub> | C <sub>154</sub> H <sub>174</sub> Gd <sub>4</sub> N <sub>14</sub> O <sub>24</sub> | C <sub>154</sub> H <sub>174</sub> Tb <sub>4</sub> N <sub>14</sub> O <sub>24</sub> | C <sub>154</sub> H <sub>168</sub> Dy <sub>4</sub> N <sub>16</sub> O <sub>22</sub> | C <sub>150</sub> H <sub>128</sub> Dy <sub>4</sub> N <sub>16</sub> O <sub>22</sub> |
| fw                                                                                      | 3212.90                                                                           | 3234.06                                                                           | 3240.74                                                                           | 3245.03                                                                           | 3156.68                                                                           |
| <i>T</i> /K                                                                             | 113(2)                                                                            | 113(2)                                                                            | 113(2)                                                                            | 293(2)                                                                            | 293(2)                                                                            |
| Cryst syst                                                                              | Triclinic                                                                         | Triclinic                                                                         | Triclinic                                                                         | Triclinic                                                                         | Monoclinic                                                                        |
| Space group                                                                             | <i>P</i> -1                                                                       | <i>P</i> -1                                                                       | <i>P</i> -1                                                                       | <i>P</i> -1                                                                       | <i>P</i> <sub>2</sub> / <i>c</i>                                                  |
| <i>a</i> /Å                                                                             | 14.9764(8)                                                                        | 14.9356(1)                                                                        | 14.9673(6)                                                                        | 15.0463(5)                                                                        | 17.423(3)                                                                         |
| <i>b</i> /Å                                                                             | 16.0330(8)                                                                        | 15.9841(9)                                                                        | 15.9870(6)                                                                        | 15.9891(6)                                                                        | 13.940(2)                                                                         |
| <i>c</i> /Å <sup>3</sup>                                                                | 17.9785(1)                                                                        | 17.9763(1)                                                                        | 17.9639(8)                                                                        | 17.9493(6)                                                                        | 30.573(6)                                                                         |
| <i>α</i> /°                                                                             | 67.916(4)                                                                         | 67.916(8)                                                                         | 67.936(4)                                                                         | 68.0810(1)                                                                        | 90                                                                                |
| <i>β</i> /°                                                                             | 74.079(5)                                                                         | 74.027(1)                                                                         | 74.001(6)                                                                         | 73.9990(1)                                                                        | 103.736(4)                                                                        |
| <i>γ</i> /°                                                                             | 71.793(4)                                                                         | 71.695(9)                                                                         | 71.656(5)                                                                         | 71.2970(1)                                                                        | 90                                                                                |
| Volume/Å <sup>3</sup>                                                                   | 3739.1(4)                                                                         | 3714.8(5)                                                                         | 3720.2(3)                                                                         | 3734.3(2)                                                                         | 7213(2)                                                                           |
| <i>Z</i>                                                                                | 1                                                                                 | 1                                                                                 | 1                                                                                 | 1                                                                                 | 2                                                                                 |
| $\rho_{\text{calc}}$ /mg/mm <sup>3</sup>                                                | 1.427                                                                             | 1.446                                                                             | 1.447                                                                             | 1.443                                                                             | 1.453                                                                             |
| $\mu$ /mm <sup>-1</sup>                                                                 | 1.726                                                                             | 1.834                                                                             | 1.950                                                                             | 2.049                                                                             | 2.119                                                                             |
| <i>F</i> (000)                                                                          | 1640                                                                              | 1644                                                                              | 1648                                                                              | 1644                                                                              | 3160                                                                              |
| 2 $\theta$ range for data collection                                                    | 3.096 to 27.567                                                                   | 3.100 to 25.019                                                                   | 3.100 to 25.009                                                                   | 2.935 to 25.006                                                                   | 3.002 to 25.010                                                                   |
| Reflections collected                                                                   | 47942                                                                             | 40809                                                                             | 41002                                                                             | 45210                                                                             | 60491                                                                             |
| Unique reflns                                                                           | 16871                                                                             | 12981                                                                             | 12988                                                                             | 13083                                                                             | 12620                                                                             |
| Goodness-of-fit on <i>F</i> <sup>2</sup>                                                | 1.051                                                                             | 1.080                                                                             | 1.056                                                                             | 1.025                                                                             | 1.039                                                                             |
| <i>R</i> <sub>1</sub> , <i>wR</i> <sub>2</sub><br>( <i>I</i> > 2 $\sigma$ ( <i>I</i> )) | 0.0277, 0.0687                                                                    | 0.0299, 0.0676                                                                    | 0.0292, 0.0772                                                                    | 0.0362, 0.0949                                                                    | 0.0885, 0.2182                                                                    |
| <i>R</i> <sub>1</sub> , <i>wR</i> <sub>2</sub> (all data)                               | 0.0316, 0.0710                                                                    | 0.0402, 0.0725                                                                    | 0.0331, 0.0821                                                                    | 0.0452, 0.1025                                                                    | 0.1318, 0.2415                                                                    |
| Largest diff.<br>Peak/hole/ e Å <sup>-3</sup>                                           | 1.854/-1.547                                                                      | 1.799/-0.934                                                                      | 2.372/-0.981                                                                      | 2.412/-1.511                                                                      | 2.552/-1.148                                                                      |
